# Supplementary material for: The Extracellular Vesicles of the Helminth Pathogen, Fasciola hepatica: Biogenesis Pathways and Cargo Molecules Involved in Parasite Pathogenesis
Source: PubMed Central journal article supplement (PMC4762619; doi:10.1074/mcp.m115.053934), 2015-10-20

**Supplementary Figure 1**

Transmission electron microscopy of the exosome-like 120K vesicle pellet (A) and the 15K vesicle pellet (B-E).

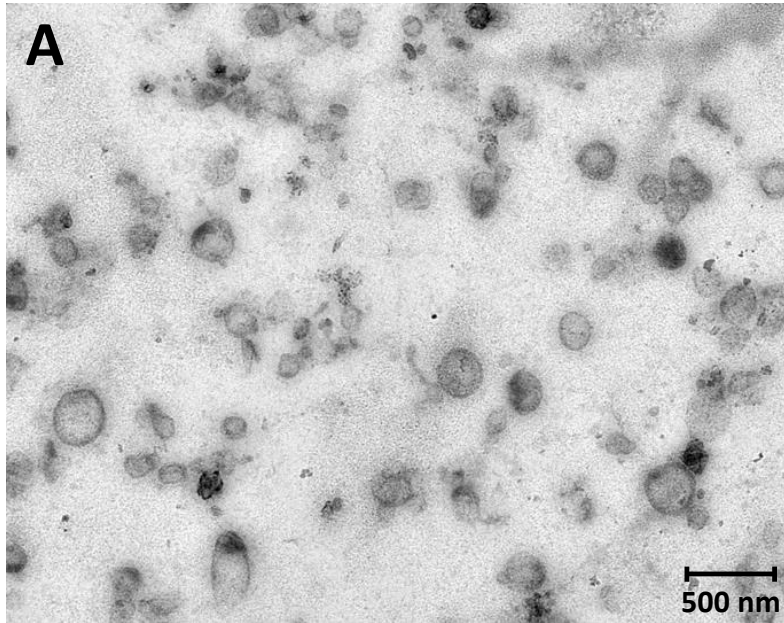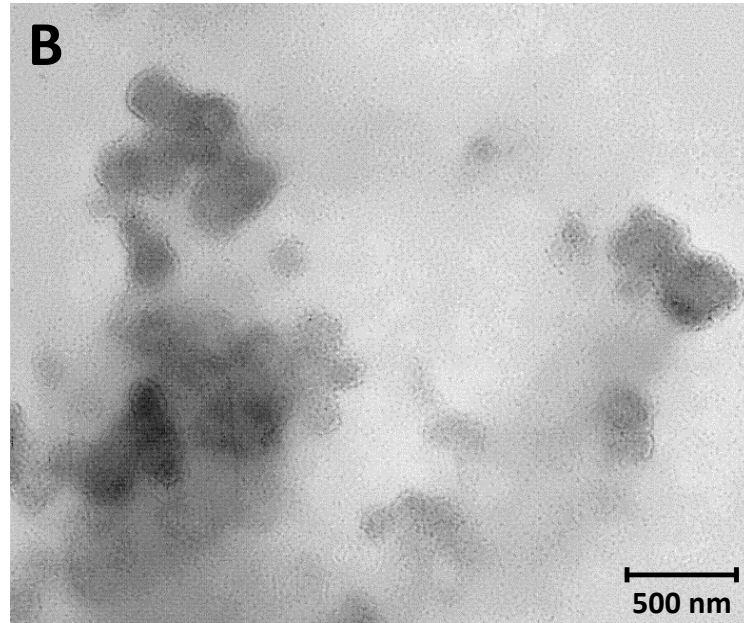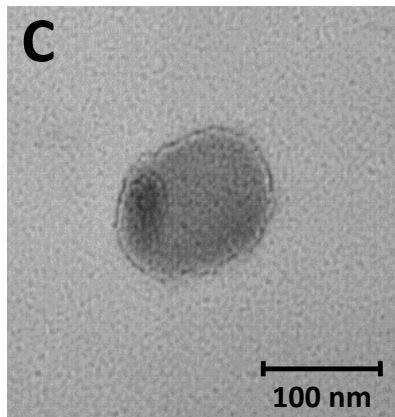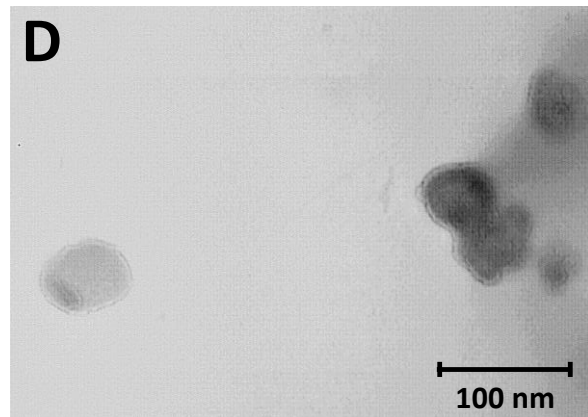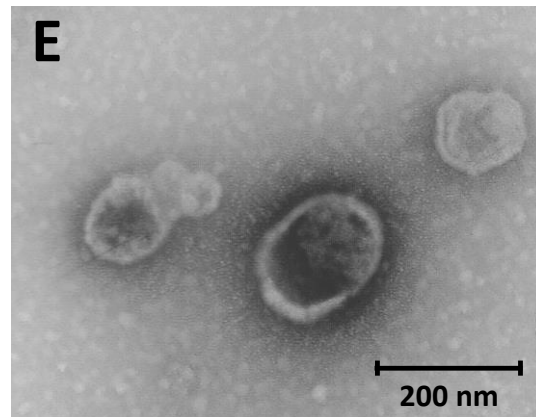

Supplement: 10.1074_M115.053934_mcp.M115.053934-2.pdf [file 10.1074_M115.053934_mcp.M115.053934-2.pdf]
