# Supplementary material for: The Extracellular Vesicles of the Helminth Pathogen, Fasciola hepatica: Biogenesis Pathways and Cargo Molecules Involved in Parasite Pathogenesis
Source: PubMed Central journal article supplement (PMC4762619; doi:10.1074/mcp.m115.053934), 2015-10-20

## Supplementary Figure 2

Proteins identified in the exosome-like EVs and total secretome of adult *F. hepatica* grouped according to function.

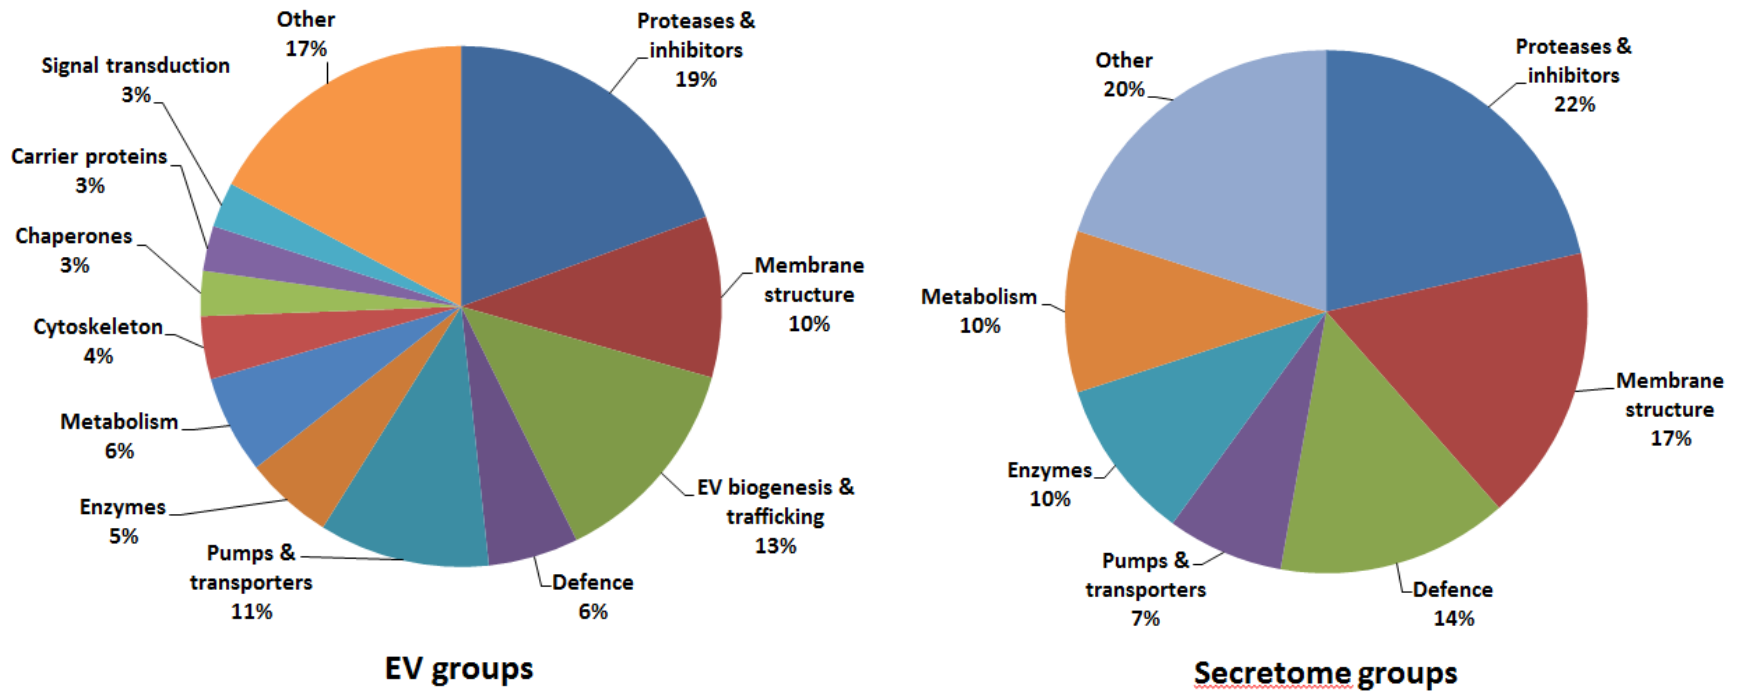

Supplement: 10.1074_M115.053934_mcp.M115.053934-3.pdf [file 10.1074_M115.053934_mcp.M115.053934-3.pdf]
